# Supplementary material for: Surface chemistry mediates the tumor entrance of nanoparticles probed using single-molecule dual-imaging nanodots
Source: Royal Society of Chemistry journal article supplement (doi:10.1039/d3bm01171b), 2023-01-01
Supplement: d3bm01171b1.pdf [file d3bm01171b1.pdf]

## Supporting information

# Surface Chemistry Mediates the Tumor Entrance of Nanoparticles Probed by Single-Molecule Dual-Imaging Nanodots

*Huiming Ren,<sup>a</sup> Qihui Hu,<sup>a,b</sup> Yuji Sun,<sup>a</sup> Xiaoxuan Zhou,<sup>b</sup> Yincong Zhu,<sup>a</sup> Qiuyang Dong,<sup>a</sup>*

*Linying Chen,<sup>a</sup> Jianbin Tang,<sup>a</sup> Hongjie Hu,<sup>b</sup> Youqing Shen<sup>a</sup> and Zhuxian Zhou<sup>a,\*</sup>*

<sup>a</sup>Key Laboratory of Biomass Chemical Engineering of Ministry of Education and Zhejiang Key Laboratory of Smart Biomaterials, College of Chemical and Biological Engineering, Zhejiang University, Hangzhou 310027, China

<sup>b</sup>Department of Radiology, Sir Run Run Shaw Hospital (SRRSH) of School of Medicine, Zhejiang University, Hangzhou, Zhejiang, 310027, China

\*Correspondence: [zhouzx@zju.edu.cn](mailto:zhouzx@zju.edu.cn)

|                                                                                                                                                                                                                                                                                                                                         |    |
|-----------------------------------------------------------------------------------------------------------------------------------------------------------------------------------------------------------------------------------------------------------------------------------------------------------------------------------------|----|
| 1. Supplemental Figures and Tables.....                                                                                                                                                                                                                                                                                                 | 3  |
| <b>Scheme S1.</b> Synthesis procedure of <b>PDI-16Fmoc-G2.5</b> . .....                                                                                                                                                                                                                                                                 | 3  |
| <b>Scheme S2.</b> Synthesis procedure of <b>PDI-16DOTA(tBu)-G3</b> . .....                                                                                                                                                                                                                                                              | 4  |
| <b>Scheme S3.</b> Synthesis procedure of <b>G6-Ac</b> . .....                                                                                                                                                                                                                                                                           | 5  |
| <b>Figure S1.</b> <sup>1</sup> H NMR spectrum of Fmoc-Lys-Boc-OPFP in CDCl <sub>3</sub> .....                                                                                                                                                                                                                                           | 5  |
| <b>Figure S2.</b> <sup>1</sup> H NMR spectrum of PDI-16Fmoc-G2.5 in DMSO-d <sub>6</sub> . .....                                                                                                                                                                                                                                         | 6  |
| <b>Figure S3.</b> <sup>1</sup> H NMR spectrum of Fmoc-Lys-Fmoc-OPFP in CDCl <sub>3</sub> . .....                                                                                                                                                                                                                                        | 6  |
| <b>Figure S4.</b> <sup>1</sup> H NMR spectra of PDI-16DOTA(tBu)-Gn (n = 3-6) in DMSO-d <sub>6</sub> .....                                                                                                                                                                                                                               | 7  |
| <b>Figure S5.</b> MALDI-TOF mass spectrum of PDI-16DOTA(tBu)-G3. ....                                                                                                                                                                                                                                                                   | 7  |
| <b>Figure S6.</b> Hydrodynamic size distribution of Gn-Ac (n = 4-6) measured by dynamic light scattering (DLS).....                                                                                                                                                                                                                     | 8  |
| <b>Figure S7.</b> TEM image of G6-Ac positively stained with 2% aqueous sodium phosphotungstate. ×120 k, 80 kV, scale bar = 100 nm. ....                                                                                                                                                                                                | 8  |
| <b>Figure S8.</b> The comparison of the zeta potential between dendrimer with and without Gd.....                                                                                                                                                                                                                                       | 8  |
| <b>Figure S9.</b> Plots of 1/T <sub>1</sub> versus the concentration of the contrast agents at 3T. ....                                                                                                                                                                                                                                 | 9  |
| <b>Figure S10.</b> The dorsal whole-body fluorescence imaging of mice with 4T1 breast cancer cells of the PDI-16(DOTA-Gd) PLL dendrimers. ....                                                                                                                                                                                          | 9  |
| <b>Figure S11.</b> The abdomen fluorescence imaging of the mice with 4T1 breast cancer cells of the PDI-16(DOTA-Gd) PLL dendrimers.....                                                                                                                                                                                                 | 10 |
| <b>Figure S12. (a)</b> The whole body T1-weighted MR images of mice bearing 4T1 orthotopic tumor before (pre) and after post-injection of ProHance®, G6-Ac and G6-OEG, at 0.1 mmol-Gd/kg. MRI signals enhancement ratio (ER = Spost /Spre) of artery <b>(b)</b> , kidneys <b>(c)</b> and liver <b>(d)</b> .....                         | 10 |
| <b>Figure S13. (a)</b> The experimental procedure for determining the cellular take and exocytosis of the nanodots on 4T1 cells. <b>(b)</b> The flow cytometry of 4T1 cells treated with different nanodots (10 μM) for 24 h. <b>(c)</b> The flow cytometry of 4T1 cells with nanodots exocytosed in fresh medium for another 24 h..... | 11 |
| <b>Figure S14.</b> Confocal laser scanning microscopy (CLSM) images and the cellular uptake of 4T1 cells after 12 h incubation with 20 μM of the nanoprobe (Scale bar = 15 μm). ....                                                                                                                                                    | 11 |
| <b>Table S1.</b> Molecular weights of PDI-DOTA PLL dendrimers determined by Maldi-Tof.....                                                                                                                                                                                                                                              | 12 |
| <b>Table S2.</b> Molecular weights of PDI-DOTA PLL dendrimers determined by GPC.....                                                                                                                                                                                                                                                    | 12 |
| <b>Table S3.</b> The parameters of the linear fitting in <b>Figure S6</b> . ....                                                                                                                                                                                                                                                        | 13 |

# 1. Supplemental Figures and Tables

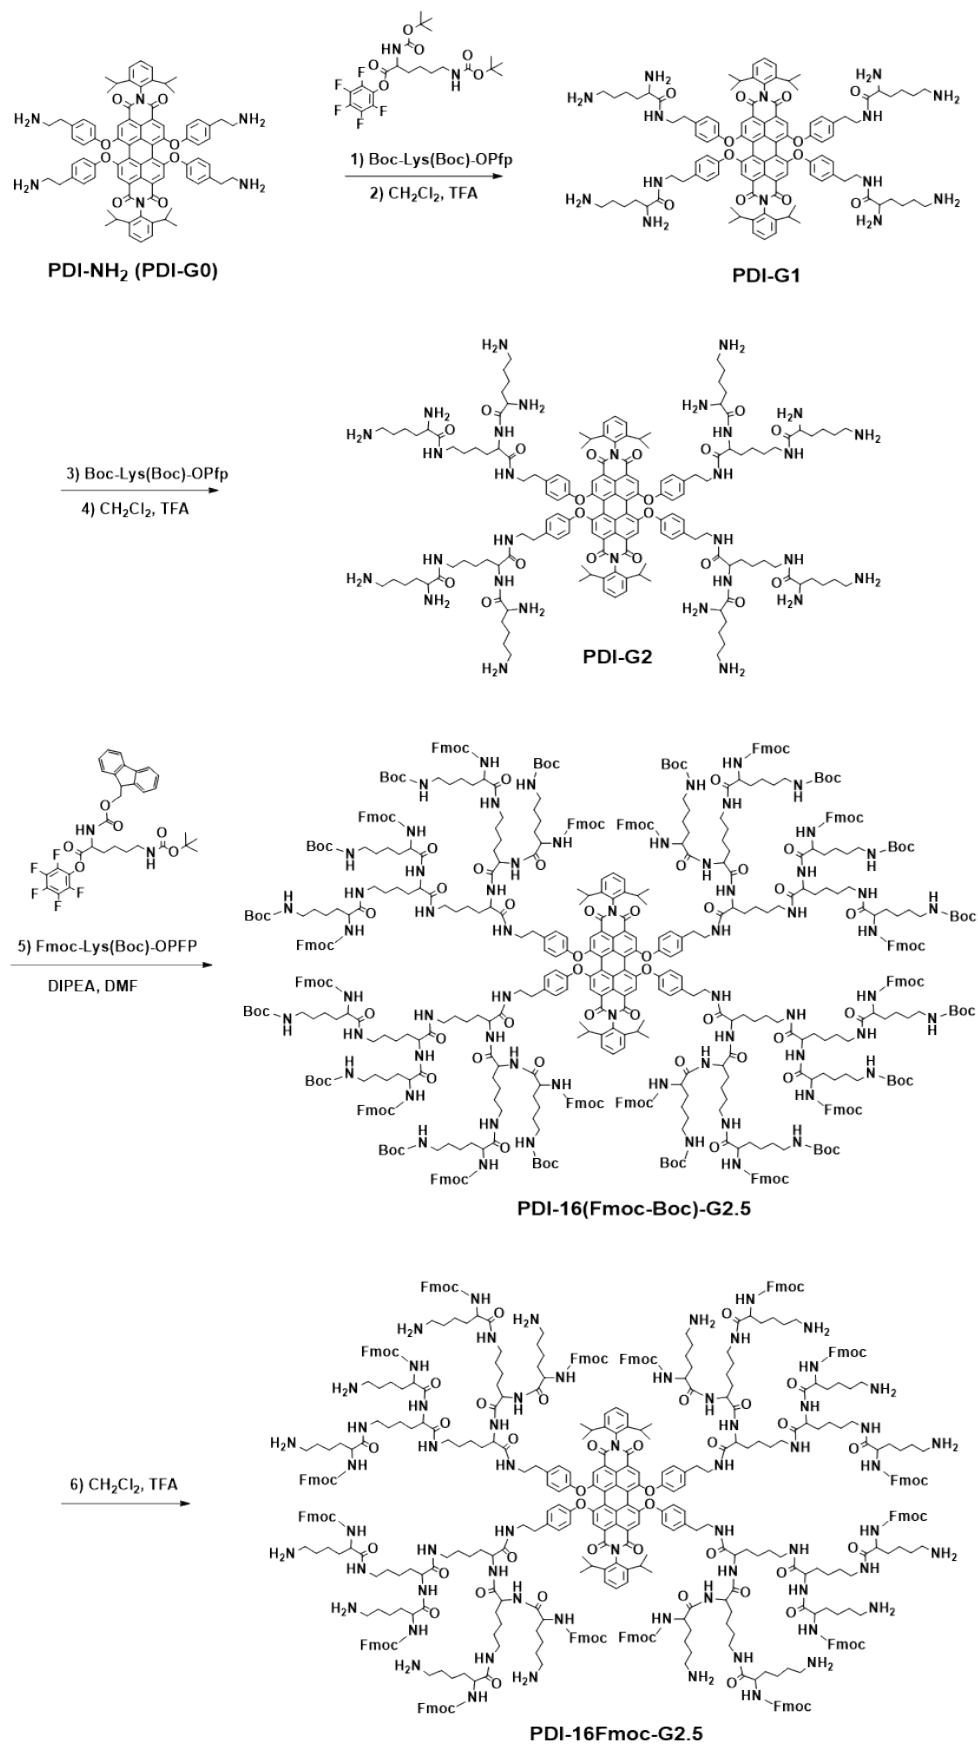

**Scheme S1.** Synthesis procedure of **PDI-16Fmoc-G2.5**.

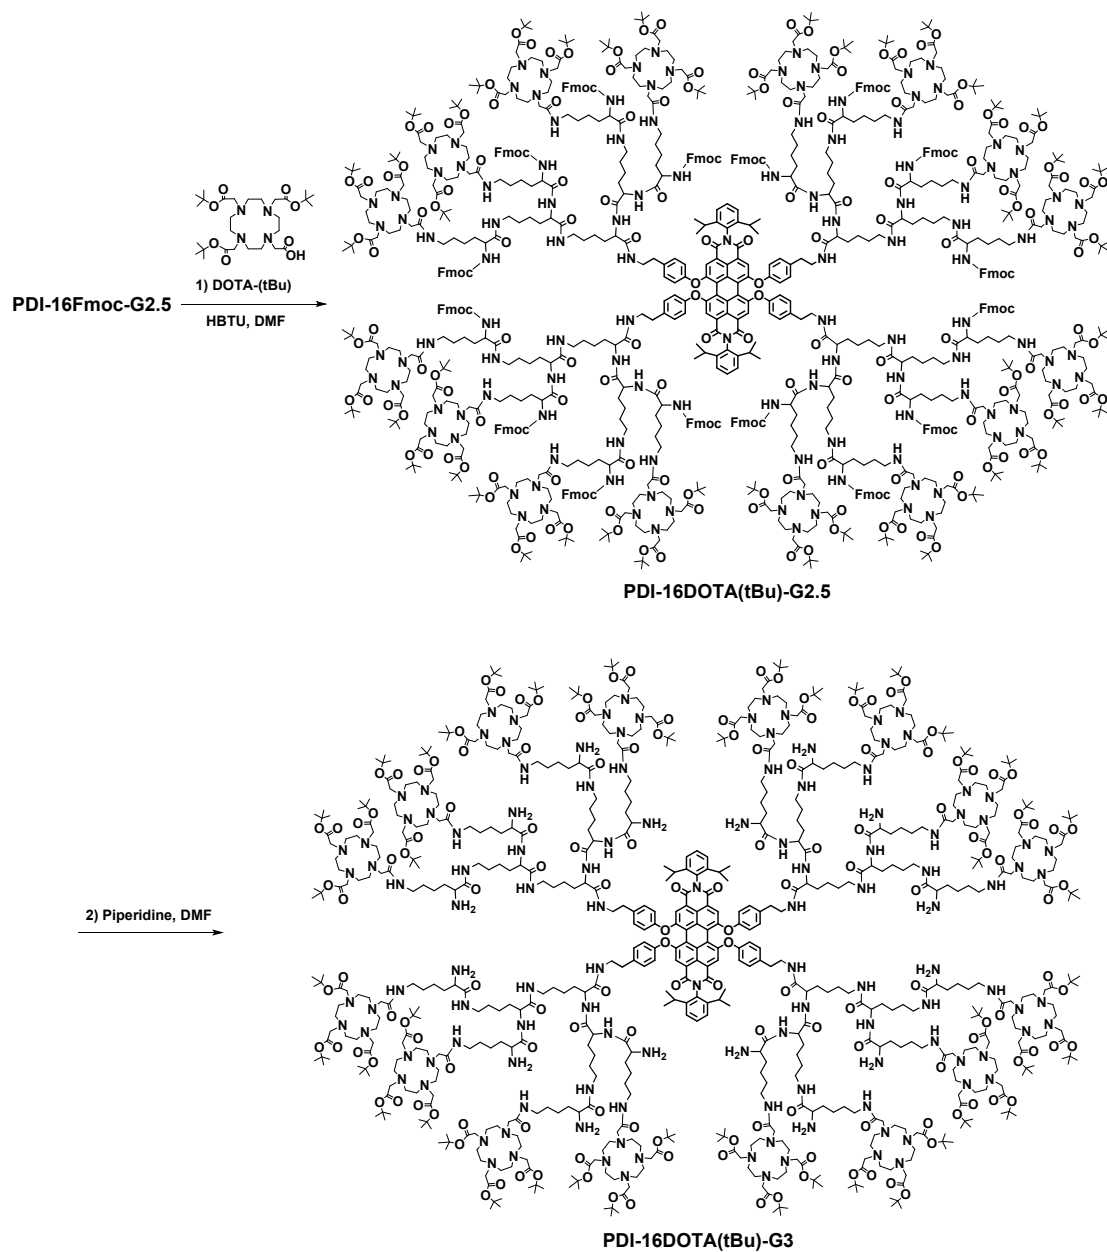

Scheme S2. Synthesis procedure of **PDI-16DOTA(tBu)-G3**.

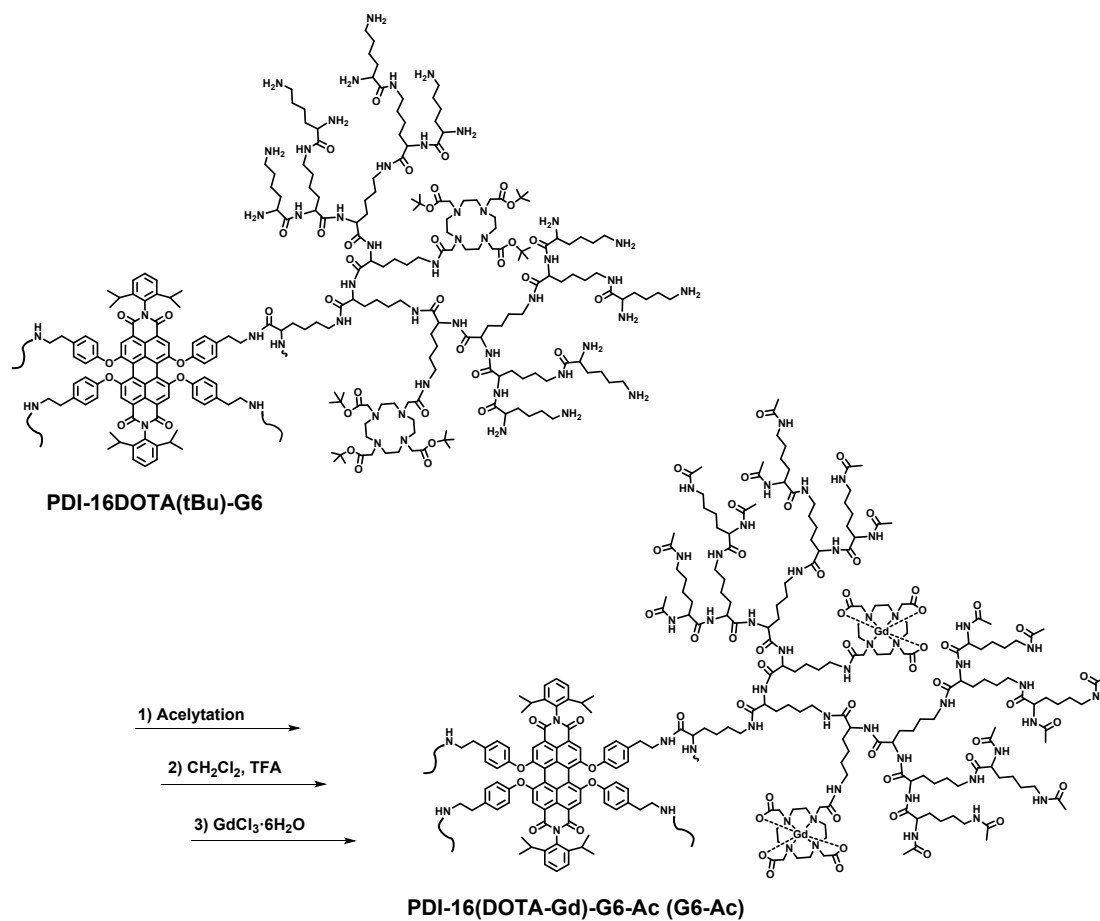

**Scheme S3.** Synthesis procedure of **G6-Ac**.

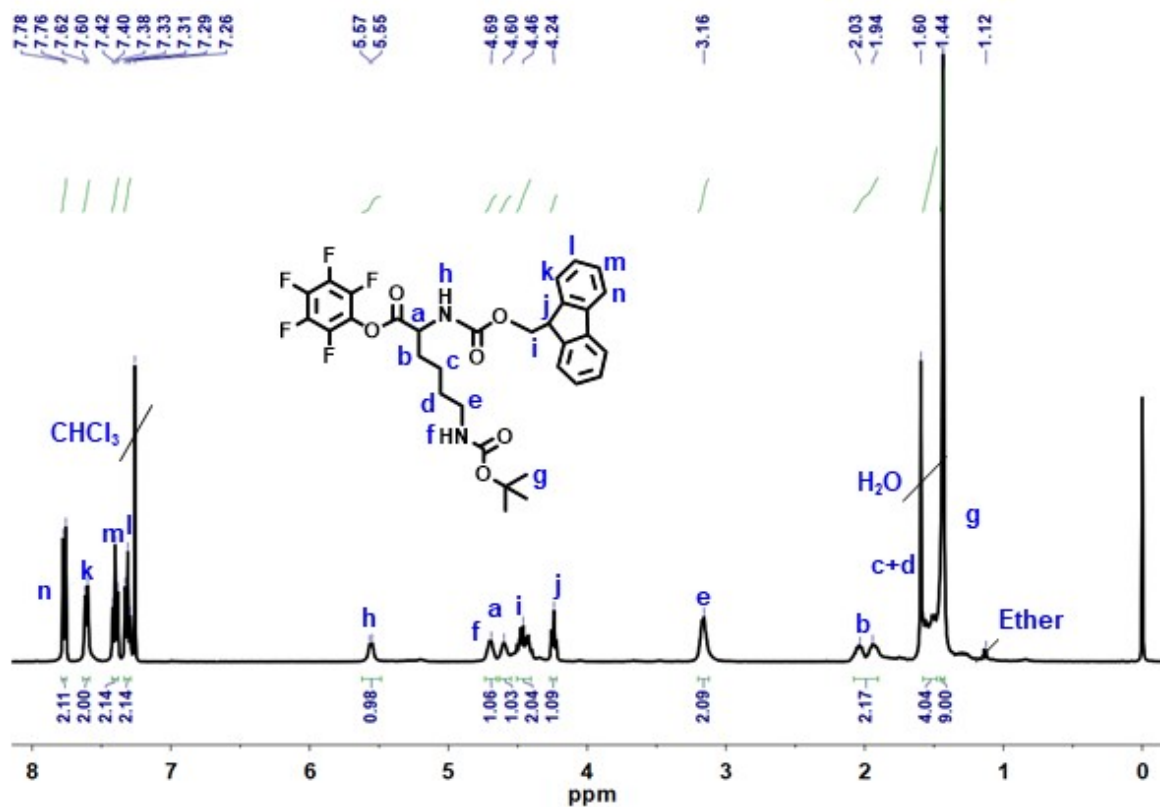

**Figure S1.** <sup>1</sup>H NMR spectrum of Fmoc-Lys-Boc-OPFP in CDCl<sub>3</sub>.

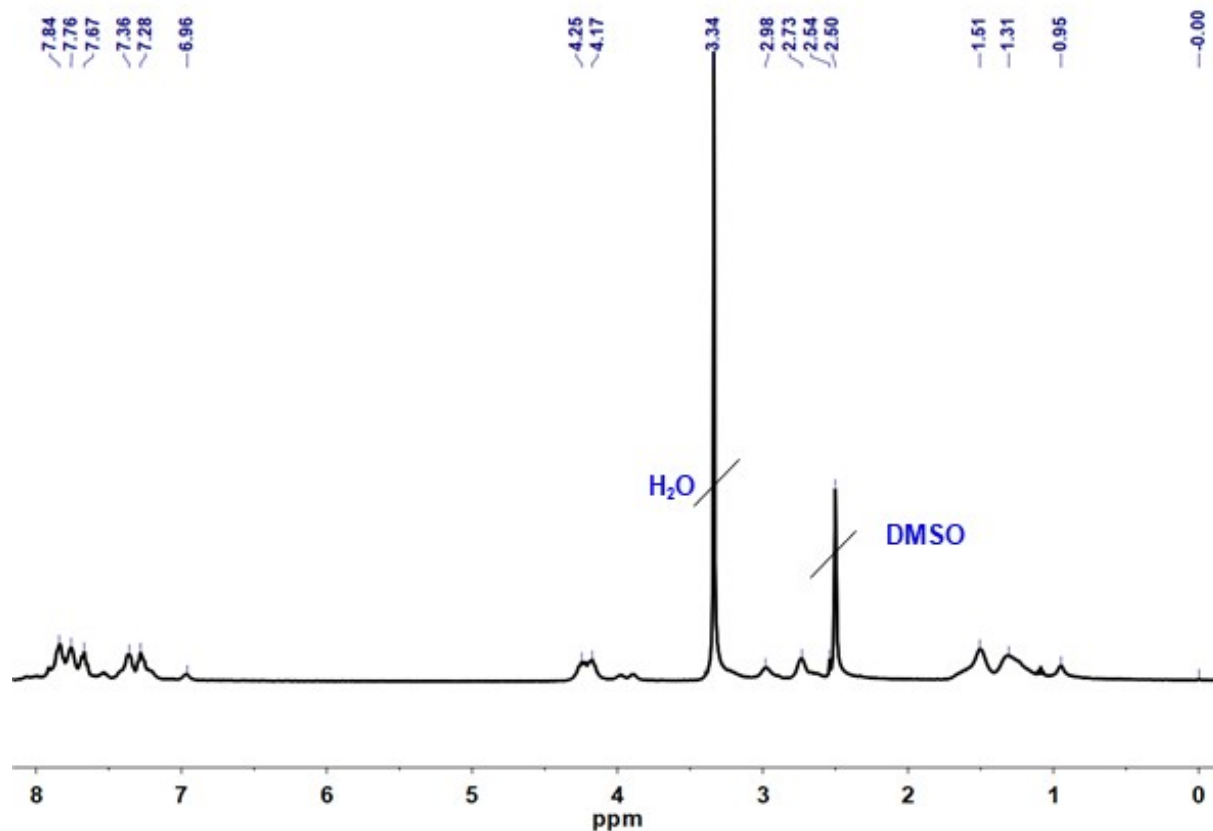

Figure S2.  $^1\text{H}$  NMR spectrum of PDI-16Fmoc-G2.5 in  $\text{DMSO-d}_6$ .

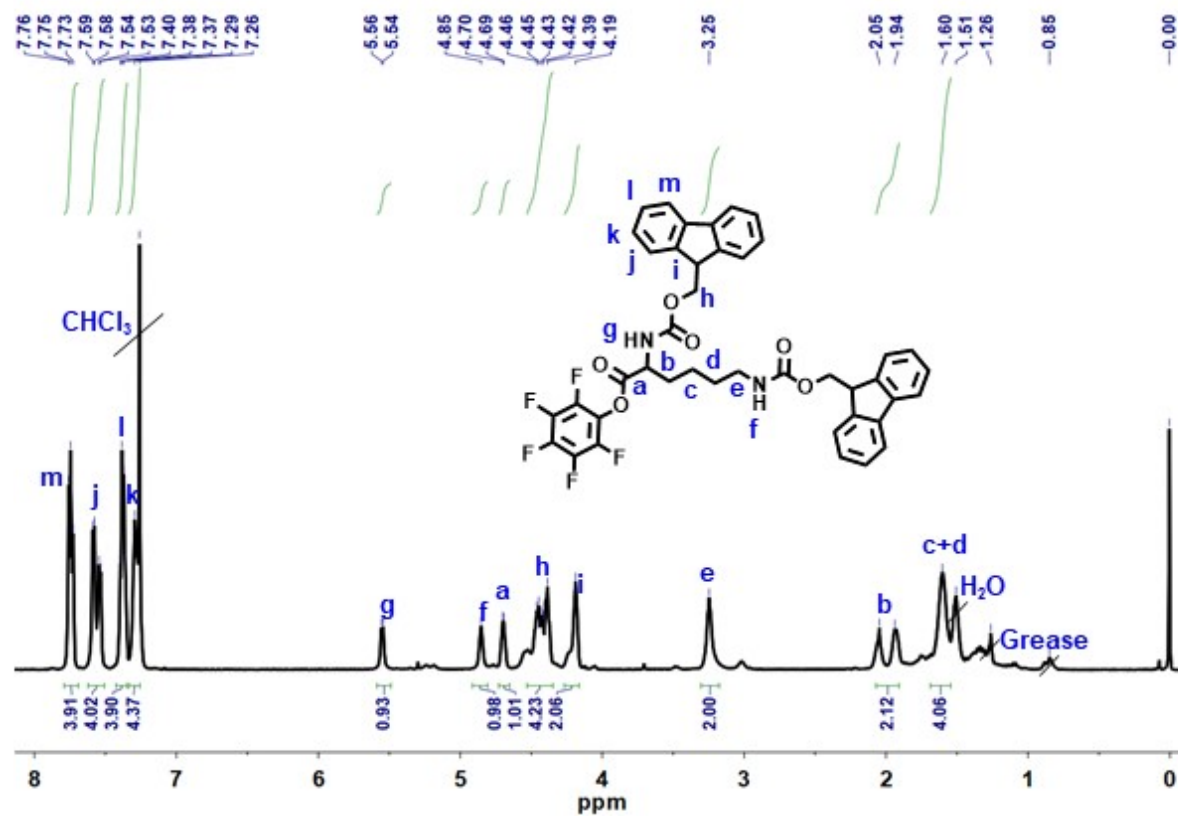

Figure S3.  $^1\text{H}$  NMR spectrum of Fmoc-Lys-Fmoc-OPFP in  $\text{CDCl}_3$ .

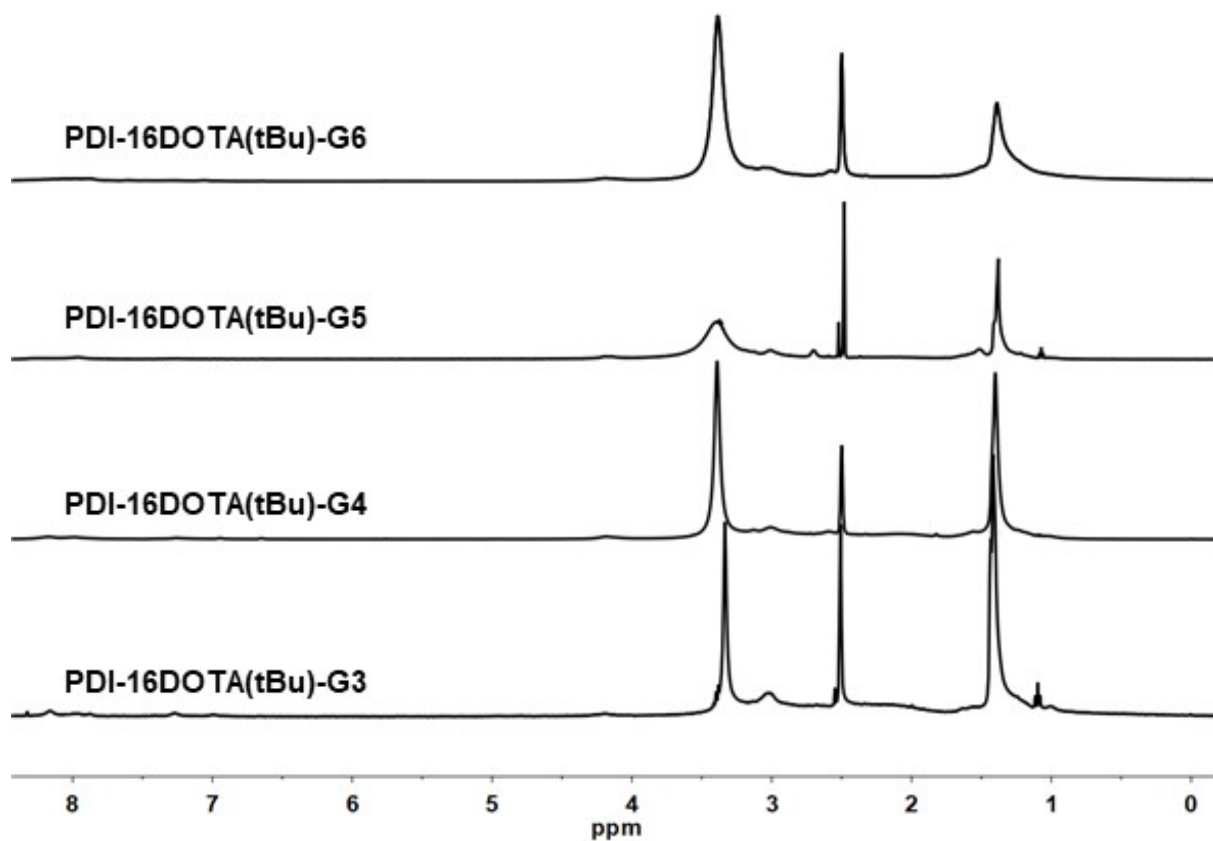

**Figure S4.** <sup>1</sup>H NMR spectra of PDI-16DOTA(tBu)-G<sub>n</sub> (n = 3-6) in DMSO-d<sub>6</sub>.

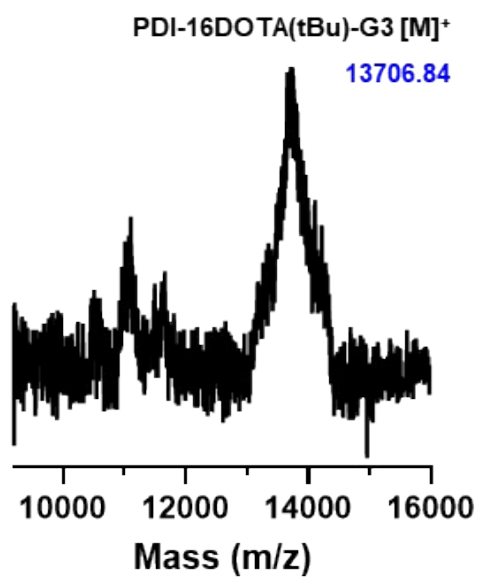

**Figure S5.** MALDI-TOF mass spectrum of PDI-16DOTA(tBu)-G3.

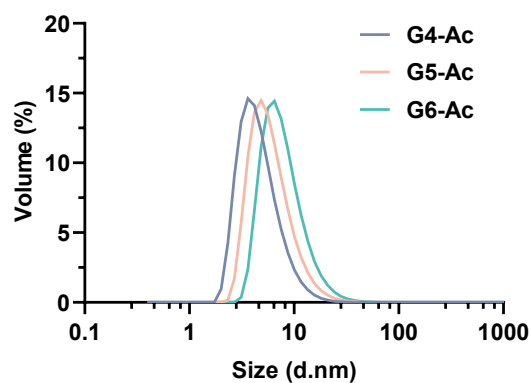

**Figure S6.** Hydrodynamic size distribution of Gn-Ac (n = 4-6) measured by dynamic light scattering (DLS).

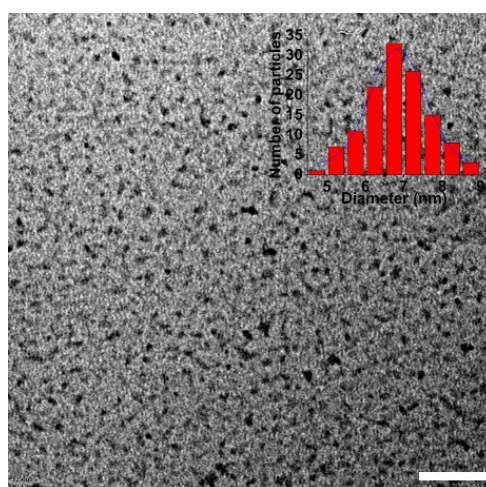

**Figure S7.** TEM image of G6-Ac positively stained with 2% aqueous sodium phosphotungstate.  $\times 120$  k, 80 kV, scale bar = 100 nm.

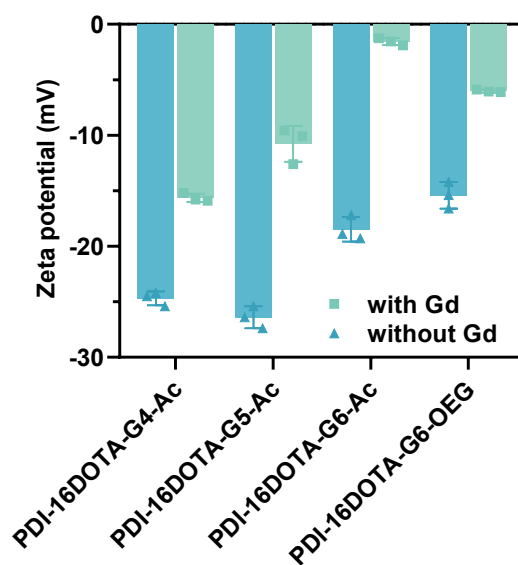

**Figure S8.** The comparison of the zeta potential between dendrimer with and without Gd.



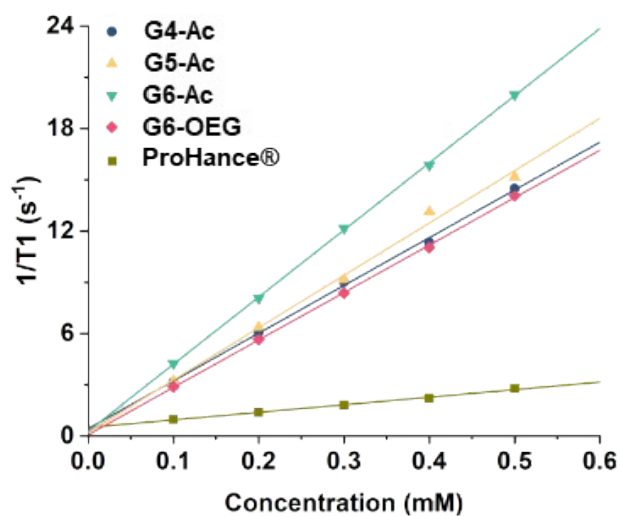

**Figure S9.** Plots of  $1/T_1$  versus the concentration of the contrast agents at 3T.

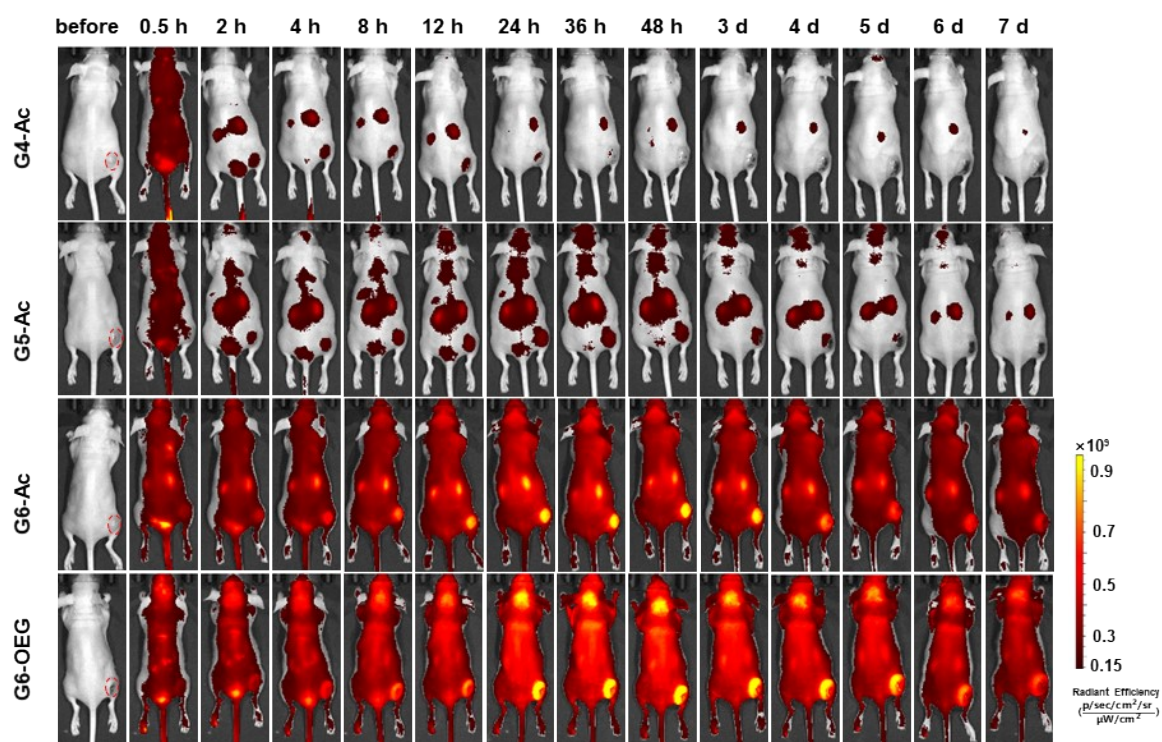

**Figure S10.** The dorsal whole-body fluorescence imaging of mice with 4T1 breast cancer cells of the PDI-16(DOTA-Gd) PLL dendrimers.

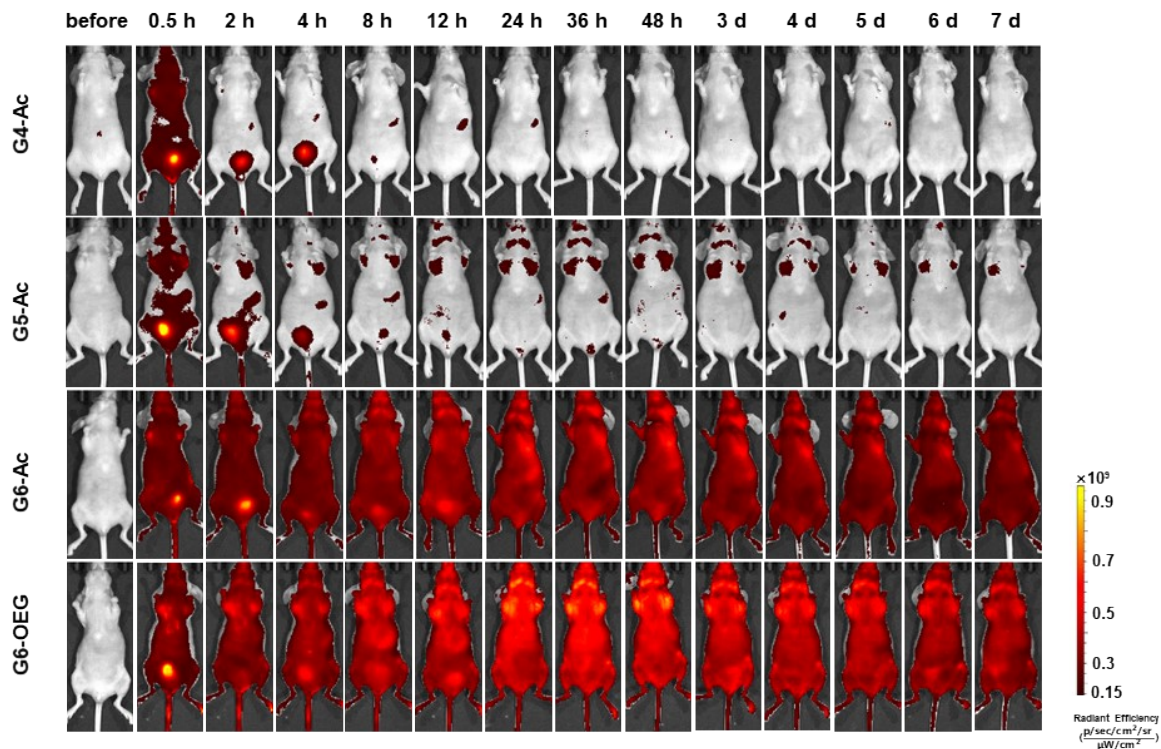

**Figure S11.** The abdomen fluorescence imaging of the mice with 4T1 breast cancer cells of the PDI-16(DOTA-Gd) PLL dendrimers.

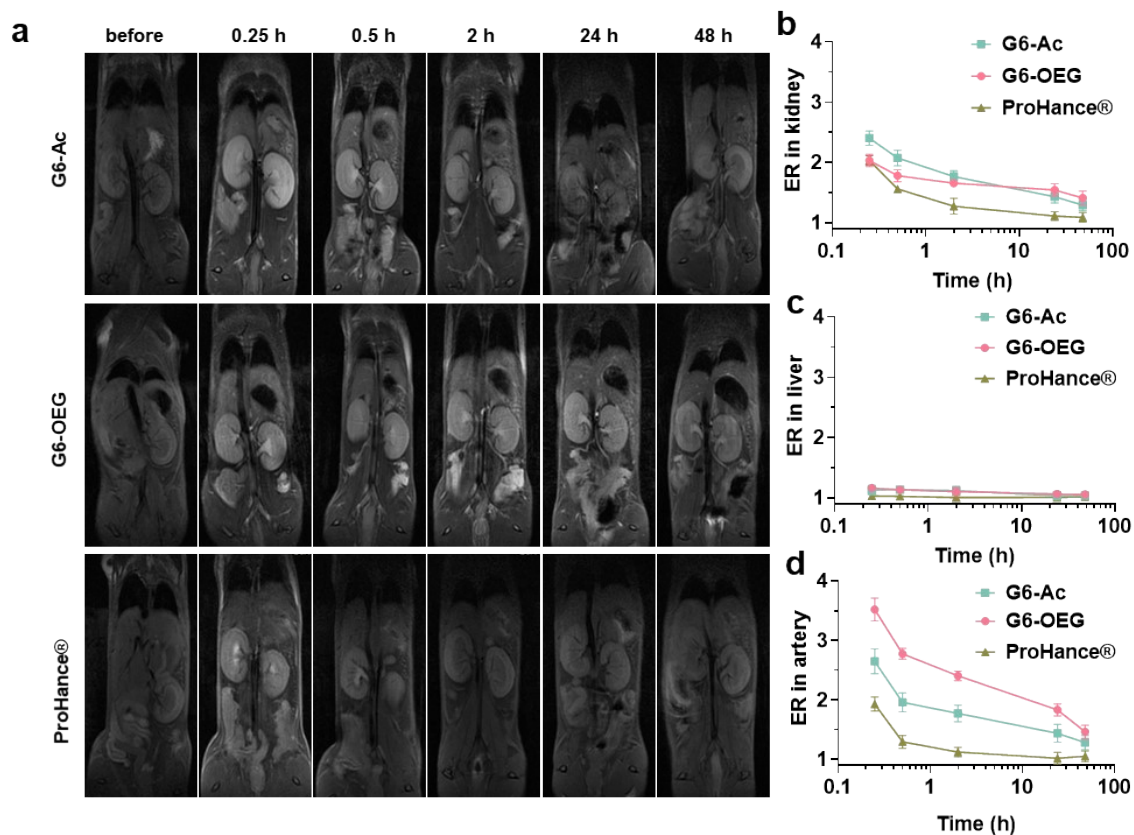

**Figure S12.** (a) The whole body T1-weighted MR images of mice bearing 4T1 orthotopic tumor before (pre) and after post-injection of ProHance®, G6-Ac and G6-OEG, at 0.1 mmol-Gd/kg. MRI signals enhancement ratio (ER =  $S_{\text{post}}/S_{\text{pre}}$ ) of artery (b), kidneys (c) and liver (d).

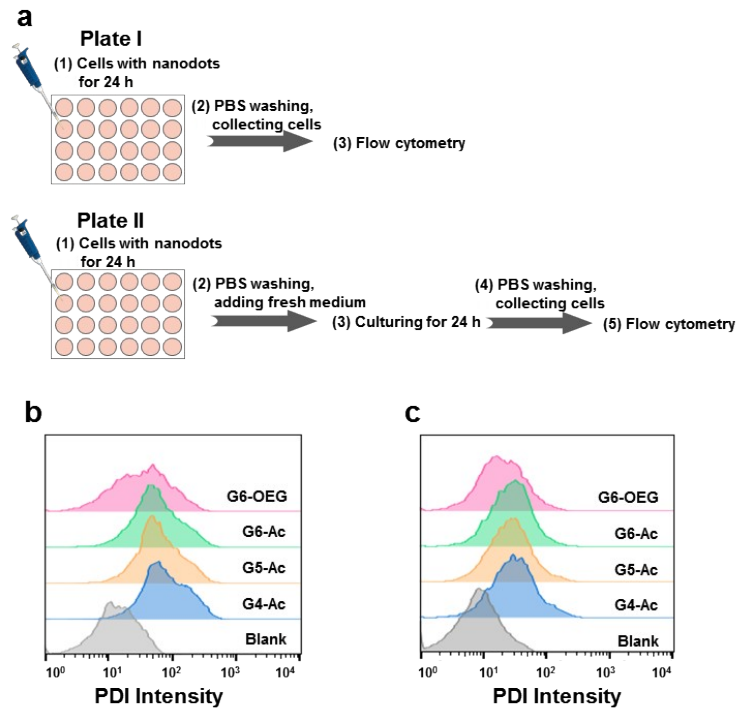

**Figure S13.** (a) The experimental procedure for determining the cellular take and exocytosis of the nanodots on 4T1 cells. (b) The flow cytometry of 4T1 cells treated with different nanodots (10  $\mu$ M) for 24 h. (c) The flow cytometry of 4T1 cells with nanodots exocytosed in fresh medium for another 24 h.

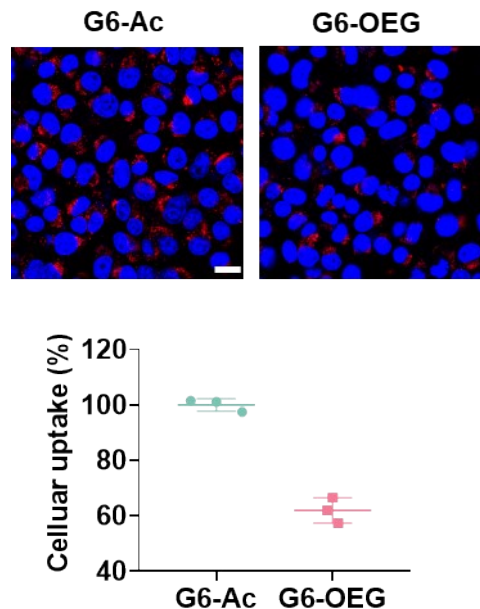

**Figure S14.** Confocal laser scanning microscopy (CLSM) images and the cellular uptake of 4T1 cells after 12 h incubation with 20  $\mu$ M of the nanoprobe (Scale bar = 15  $\mu$ m).

**Table S1.** Molecular weights of PDI-DOTA PLL dendrimers determined by Maldi-Tof.

| Sample             | Number of Amines | Theoretical value | Measured by Maldi-Tof |
|--------------------|------------------|-------------------|-----------------------|
| PDI-G2             | 16               | 2790.14           | 2790.71               |
| PDI-16Fmoc-G2.5    | 16               | 8390.34           | 4842.71*              |
| PDI-16DOTA(tBu)-G3 | 16               | 13707.13          | 13707.15              |
| PDI-16DOTA(tBu)-G4 | 32               | 15756.65          | 15757.74              |
| PDI-16DOTA(tBu)-G5 | 64               | 19864.69          | ND                    |
| PDI-16DOTA(tBu)-G6 | 128              | 28062.77          | ND                    |

**Table S2.** Molecular weights of PDI-DOTA PLL dendrimers determined by GPC.

| Sample                | Number of Lysine | Theoretical value | Measured by GPC | PDI(Mw/Mn) |
|-----------------------|------------------|-------------------|-----------------|------------|
| PDI-G1.5              | 12               | 4390              | 17810           | 1.09       |
| PDI-16(Fmoc-Boc)-G2.5 | 28               | 9991              | 30390           | 1.06       |
| PDI-16DOTA(tBu)-G2.5  | 28               | 17260             | 37010           | 1.08       |
| PDI-16DOTA(tBu)-G3.5  | 44               | 22859             | 38220           | 1.09       |
| PDI-16DOTA(tBu)-G4.5  | 76               | 34059             | 49910           | 1.12       |
| PDI-16DOTA(tBu)-G5.5  | 140              | 56459             | 64560           | 1.14       |

**Table S3.** The parameters of the linear fitting in **Figure S6**.

| Sample    | $y = a + b \cdot x$ |                  |             |             |
|-----------|---------------------|------------------|-------------|-------------|
|           | Y-intercept (a)     | Slope (b)        | Pearson's R | $R^2$ (COD) |
| ProHance® | $0.50 \pm 0.05$     | $4.43 \pm 0.16$  | 0.99805     | 0.9961      |
| G4-Ac     | $0.43 \pm 0.22$     | $27.96 \pm 0.66$ | 0.99916     | 0.99832     |
| G5-Ac     | $0.21 \pm 0.49$     | $30.65 \pm 1.48$ | 0.99653     | 0.99308     |
| G6-Ac     | $0.27 \pm 0.12$     | $39.31 \pm 0.35$ | 0.99988     | 0.99976     |
| G6-OEG    | $0.07 \pm 0.12$     | $27.77 \pm 0.36$ | 0.99975     | 0.99949     |
